# Supplementary material for: Male Reproductive Organ Weight: Criteria for Detection of Androstenone-Positive Carcasses in Immunocastrated and Entire Male Pigs
Source: MDPI journal article supplement (doi:10.3390/ani13122042), 2023-06-20
Supplement: s1 [file s1]

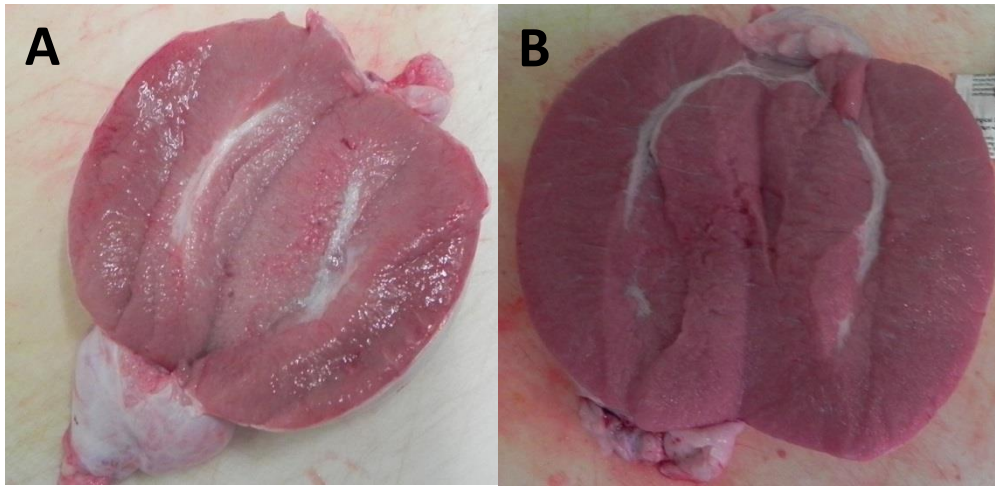

**Figure S1:** The cross section of testes from immunocastrated (**A**) and entire (**B**) male pig made for measurement of color in CIE  $L^*$ ,  $a^*$ ,  $b^*$  color space.
